# Supplementary material
Source: PubMed Central journal article supplement (PMC3997165)

A.

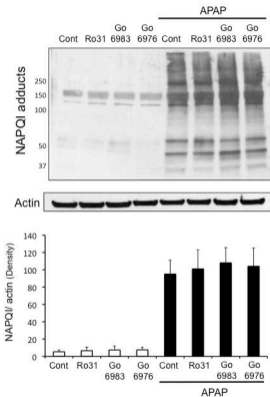

B.

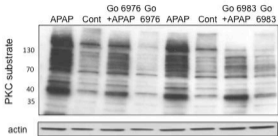

A.

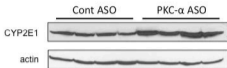

B.

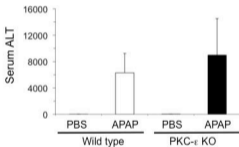

Supplement: NIHMS508351-supplement-Supp_Fig_S1-S2.pdf [file NIHMS508351-supplement-Supp_Fig_S1-S2.pdf]
